# Supplementary material for: Spermatogenesis of Male Patients with Congenital Hypogonadotropic Hypogonadism Receiving Pulsatile Gonadotropin-Releasing Hormone Therapy Versus Gonadotropin Therapy: A Systematic Review and Meta-Analysis
Source: PubMed Central journal article supplement — World J Mens Health. 2020 Jul 14;39(4):654–65. doi: 10.5534/wjmh.200043 (PMC8443979; doi:10.5534/wjmh.200043), 2020-07-14
Supplement: wjmh-39-654-s001.pdf [file wjmh-39-654-s001.pdf]

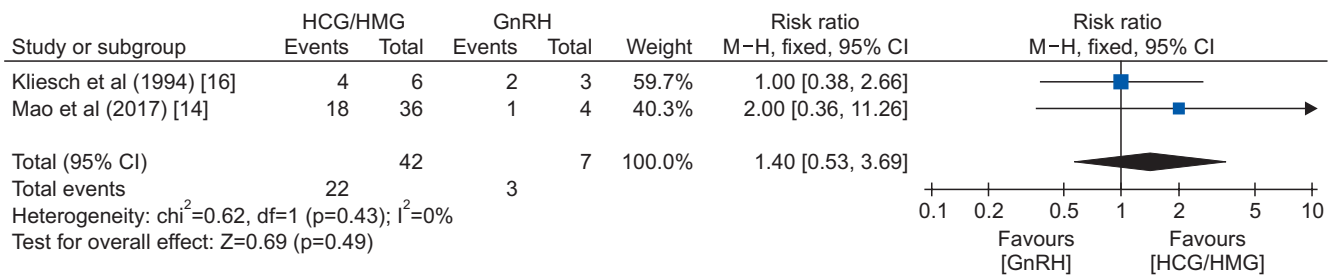

**Supplement Fig. 1.** Forest plot of spermatogenesis rate of patients with cryptorchidism after gonadotropin-releasing hormone (GnRH) therapy compared to gonadotrophin therapy. HCG: human chorionic gonadotropin, HMG: human menopausal gonadotropin, M-H: Mantel-Haenszel, CI: confidence interval, df: degree of freedom.
