# Supplementary material for: Spermatogenesis of Male Patients with Congenital Hypogonadotropic Hypogonadism Receiving Pulsatile Gonadotropin-Releasing Hormone Therapy Versus Gonadotropin Therapy: A Systematic Review and Meta-Analysis
Source: PubMed Central journal article supplement — World J Mens Health. 2020 Jul 14;39(4):654–65. doi: 10.5534/wjmh.200043 (PMC8443979; doi:10.5534/wjmh.200043), 2020-07-14
Supplement: wjmh-39-654-s003.pdf [file wjmh-39-654-s003.pdf]

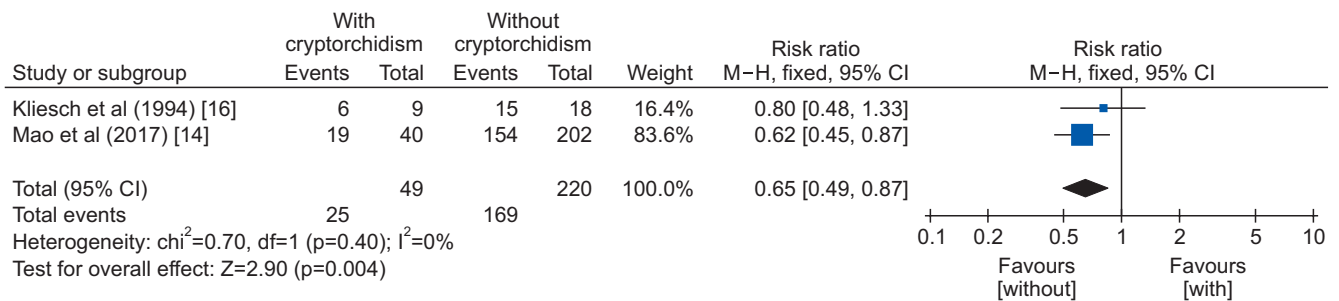

**Supplement Fig. 3.** Forest plot of spermatogenesis rate after gonadotropin-releasing hormone (GnRH) and gonadotrophin therapy for patients with cryptorchidism compared to those without cryptorchidism. M-H: Mantel-Haenszel, CI: confidence interval, df: degree of freedom.
