# Supplementary material for: Spermatogenesis of Male Patients with Congenital Hypogonadotropic Hypogonadism Receiving Pulsatile Gonadotropin-Releasing Hormone Therapy Versus Gonadotropin Therapy: A Systematic Review and Meta-Analysis
Source: PubMed Central journal article supplement — World J Mens Health. 2020 Jul 14;39(4):654–65. doi: 10.5534/wjmh.200043 (PMC8443979; doi:10.5534/wjmh.200043), 2020-07-14
Supplement: wjmh-39-654-s004.pdf [file wjmh-39-654-s004.pdf]

**Supplement Table 1.** List of search strings in different databases

| Database       | Search string                                                                                                                                                                                                                                                                                                                                                                                                                                                                                                                                                                                                          |
|----------------|------------------------------------------------------------------------------------------------------------------------------------------------------------------------------------------------------------------------------------------------------------------------------------------------------------------------------------------------------------------------------------------------------------------------------------------------------------------------------------------------------------------------------------------------------------------------------------------------------------------------|
| PubMed         | ((((((((((hypothalamic hypogonadism) OR hypogonadotropic hypogonadism) OR idiopathic hypogonadotropic hypogonadism)) OR IHH) OR Kallmann's syndrome)) OR congenital hypogonadotropic hypogonadism) AND "Gonadotropin-Releasing Hormone"[Mesh]) AND ((((((human chorionic gonadotropin) OR human menopausal gonadotropin) OR follicle stimulating hormone) OR HCG) OR HMG) OR FSH)                                                                                                                                                                                                                                      |
| Web of Science | (TS = (hypothalamic hypogonadism OR hypogonadotropic hypogonadism OR idiopathic hypogonadotropic hypogonadism OR IHH OR Kallmann's syndrome OR congenital hypogonadotropic hypogonadism) AND TS = (human chorionic gonadotropin OR human menopausal gonadotropin OR follicle stimulating hormone OR HCG OR HMG OR FSH) AND TS = (Gonadotropin-Releasing Hormone OR GnRH)) AND DOCUMENT TYPES: (Article)                                                                                                                                                                                                                |
| Scopus         | (TITLE-ABS-KEY (hypothalamic hypogonadism) OR TITLE-ABS-KEY (hypogonadotropic hypogonadism) OR TITLE-ABS-KEY (congenital hypogonadotropic hypogonadism) OR TITLE-ABS-KEY (idiopathic hypogonadotropic hypogonadism) OR TITLE-ABS-KEY (IHH) OR TITLE-ABS-KEY (kallmann's syndrome)) AND (TITLE-ABS-KEY (gonadotropin-releasing hormone) OR TITLE-ABS-KEY (GnRH)) AND (TITLE-ABS-KEY (human chorionic gonadotropin) OR TITLE-ABS-KEY (human menopausal gonadotropin) OR TITLE-ABS-KEY (follicle stimulating hormone) OR TITLE-ABS-KEY (HCG) OR TITLE-ABS-KEY (HMG) OR TITLE-ABS-KEY (FSH)) AND DOCUMENT TYPES: (Article) |
