# Supplementary material for: Spermatogenesis of Male Patients with Congenital Hypogonadotropic Hypogonadism Receiving Pulsatile Gonadotropin-Releasing Hormone Therapy Versus Gonadotropin Therapy: A Systematic Review and Meta-Analysis
Source: PubMed Central journal article supplement — World J Mens Health. 2020 Jul 14;39(4):654–65. doi: 10.5534/wjmh.200043 (PMC8443979; doi:10.5534/wjmh.200043), 2020-07-14
Supplement: wjmh-39-654-s005.pdf [file wjmh-39-654-s005.pdf]

Supplement Table 2. Risk of bias summary for included study according to ROBINS-1

| Author (year)              | Bias due to confounding                                                       | Bias in selection of participants into study                      | Bias in classification of interventions              | Bias due to deviations from intended intervention                                                                       | Bias due to missing data                                       | Bias in measurement of outcomes           | Bias in selection of the reported result                   |
|----------------------------|-------------------------------------------------------------------------------|-------------------------------------------------------------------|------------------------------------------------------|-------------------------------------------------------------------------------------------------------------------------|----------------------------------------------------------------|-------------------------------------------|------------------------------------------------------------|
| Büchter et al (1998) [15]  | Serious<br>The initial testicular volumes were not well adjusted              | NI<br>No information about the patient inclusion                  | Low<br>Both therapies were well-defined intervention | Moderate<br>One patient received GnRH therapy right after gonadotropin therapy                                          | Low<br>No losses were reported                                 | Moderate<br>No masking strategy specified | Low<br>All results are subjective and well-defined measure |
| Gong et al (2015) [10]     | Low<br>All baseline characteristics were balanced between two groups          | NI<br>No information about the patient inclusion                  | Low<br>Both therapies were well-defined intervention | Low<br>NO co-intervention between intervention groups                                                                   | Low<br>No losses were reported                                 | Moderate<br>No masking strategy specified | Low<br>All results are subjective and well-defined measure |
| Huang et al (2015) [13]    | Low<br>All baseline characteristics were balanced between two groups          | Low<br>Consecutive patients were included                         | Low<br>Both therapies were well-defined intervention | Low<br>NO co-intervention between intervention groups                                                                   | Low<br>No losses to FU                                         | Moderate<br>No masking strategy specified | Low<br>All results are subjective and well-defined measure |
| Kliesch et al (1994) [16]  | Low<br>All baseline characteristics were balanced between two groups          | NI<br>No information about the patient inclusion                  | Low<br>Both therapies were well-defined intervention | Moderate<br>One patient received GnRH therapy right after gonadotropin therapy                                          | Low<br>No losses to FU                                         | Moderate<br>No masking strategy specified | Low<br>All results are subjective and well-defined measure |
| Liu et al (1988) [11]      | Serious<br>Not adjusted for baseline variables (e.g., age)                    | NI<br>No information about the patient inclusion                  | Low<br>Both therapies were well-defined intervention | Low<br>NO co-intervention between intervention groups                                                                   | Serious<br>Samples of two patients were unable to be collected | Moderate<br>No masking strategy specified | Low<br>All results are subjective and well-defined measure |
| Mao et al (2017) [14]      | Serious<br>Not adjusted for baseline variables (e.g., age, testicular volume) | Serious<br>Only subject with more than 12 month FU were recruited | Low<br>Both therapies were well-defined intervention | Low<br>NO co-intervention between intervention groups                                                                   | Low<br>No losses to FU                                         | Moderate<br>No masking strategy specified | Low<br>All results are subjective and well-defined measure |
| Schopohl et al (1991) [12] | Low<br>All baseline characteristics were balanced between two groups          | NI<br>No information about the patient inclusion                  | Low<br>Both therapies were well-defined intervention | Low<br>One patient changed from GnRH to gonadotropin therapy, but did not get a spermatogenesis and the bias is minimal | Low<br>No losses to FU                                         | Moderate<br>No masking strategy specified | Low<br>All results are subjective and well-defined measure |

NI: no information, GnRH: gonadotropin-releasing hormone, FU: follow-up.
